# Supplementary material for: 2020 American Neuropsychiatric Association Annual Meeting Abstracts
Source: Atypon-hosted journal article supplement (doi:10.1176/appi.neuropsych.19100220), 2020-07-01
Supplement: appi.neuropsych.19100220.ds001.pdf [file appi.neuropsych.19100220.ds001.pdf]

# 2020 American Neuropsychiatric Association Annual Meeting Abstracts

Full text of abstracts that were accepted for presentation at the 2020 Annual Meeting can be found in the online edition of the Summer 2020 issue, at <http://neuro.psychiatryonline.org>. The abstracts can be cited in the following format:

Author name(s): Title of abstract, in Abstracts Submitted for the 31st Annual Meeting of the American Neuropsychiatric Association. *J Neuropsychiatry Clin Neurosci* 2020; 32(3):e1–e26

- P1. Global Neuropsychiatry: When Total Body Stiffness and Muscle Spasms Are Not a Functional Movement Disorder.** *H. Abdulrahman, I. Caqli, M. Mumin, J. Hirs, Z. Chemali*
- P2. The Use of Geste Antagoniste in a Case of Functional Movement Disorder.** *Janette K. Abramowitz, Taylor R. Young, Jordan H. Eisenstock, Ari J. Wilkenfeld*
- P3. Multicenter Evaluation of Memory Remediation in Traumatic Brain Injury With Donepezil (the MEMRI-TBI-D Study): A Randomized Controlled Trial.** *David B. Arciniegas, Jessie Ketchum, Angelle M. Sander, Emily Almeida, Jay Bogaards, Joseph Giacino, Flora Hammond, Cindy Harrison-Felix, Tessa Hart, David Mellick, Mark Sherer, John Whyte, Ross D. Zafonte*
- P4. Hear Hoofbeats, Think Zebras: Neurological Disorders Diagnosed as Psychiatric Illness.** *Patricia A. Arnold, Hilary R. Linzie, Katherine B. Brownlowe*
- P5. Machine Learning Prediction of AV-1451 Braak-Like Staging From Readily Available Clinical Variables.** *Matthew R. Ayers, Shannon L. Risacher, Andrew J. Saykin, Liana G. Apostolova, David G. Clark*
- P6. Neuropsychiatric Manifestations of Moyamoya Disease in a 7-Year-Old Boy: A Case Report.** *Dipaloke Banik, Rashedul Hasan*
- P7. Network Localization of Spontaneous Confabulation.** *James R. Bateman, Michael A. Ferguson, C. Alan Anderson, David B. Arciniegas, Asaf Gilboa, Brian D. Berman, Michael D. Fox*
- P8. Levodopa Perfusion fMRI in Parkinson Disease.** *Kevin J. Black, Jonathan M. Koller, Haley K. Acevedo, Susan K. Loftin, Joel S. Perlmutter*
- P9. Neurosarcoidosis Presenting as Catatonia.** *Austin W. Blum, Victor G. Patron Romero, Joseph J. Cooper*
- P10. Inattentive Blindness: From Neurons to Social Networks.** *Sonja Blum*
- P11. A Case of Mistaken Identities: Is There Really an Increased Risk of Psychosis in Seizure Patients?** *Yarden Bornovski, Ebony Jackson-Shaheed, Stephanie Argraves, M.J. Pugh, Joseph Goulet, Hamada Altalib*
- P12. Does rTMS Work Through Synaptic Plasticity? A Motor Plasticity Study of d-cycloserine.** *Joshua C. Brown, William Devries, Mark S. George*
- P13. Factor Structure of the RBANS in Patients With Huntington's Disease.** *Janessa O. Carvalho, Beth A. Springate*
- P14. Bilateral Palmomental "Frontal Release" Subtype of OCD.** *Shawn Cassidy*
- P15. An Unusual Case of Aphasia With Psychosis.** *Aaditya Chandrasekar, Sahar Alee Koloukani, Varun Kavuru, William S. Rea*
- P16. Anti-Seizure Medication Titration to Facilitate Electroconvulsive Therapy for the Treatment of Major Depressive Disorder With Psychotic Features in a Patient With Epilepsy.** *Kaitlin Clifford, David Taplinger, Anya Tisher*
- P17. A Case of Recurrent Steroid Responsive Encephalopathy Associated With Thyroiditis (SREAT) Status Post Steroid Taper Presenting to a State Psychiatric Hospital.** *Stephanie N. Cripps, Ahmad Adi, Nabil Ali*
- P18. Transcranial Direct Current Stimulation Modulates Dysexecutive Deficits and its Neurophysiological Signatures in Attention-Deficit Hyperactivity Disorder.** *Laura Dubreuil-Vall, Federico Gomez-Bernal, Ana C. Villegas, Patricia Cirillo, Craig Surman, Giulio Ruffini, Alik S. Widge, Joan A. Camprodon*
- P19. Post-Stroke Akinetic Mutism Versus Catatonia: Lorazepam-Challenges, MRIs, and Psychostimulant-Challenges to Investigate a Differential.** *Josh Eloge, Jon Kaplan*
- P20. Treatment of Psychosis and Catatonia With Electroconvulsive Therapy in a 17-year-old With Systemic Lupus Erythematosus.** *Alessandra G. Ferrera, Hamilton M. Harris, Julianne M. Giust, Maurizio M. Pugliese, Ryan P. O'Connor, Cassie D. Karlsson*
- P21. Asymmetrical Interaction of TBI and PTSD and a Potential Rodent Model of CTE.** *Arman Fesharaki, Marius Trésor Chiasseu, Stephen M Strittmatter*
- P22. Diminished Adaptive Decision Making and Limbic Connectivity in Mediodorsal Thalamic Injury.** *Maiya R. Geddes, MaryAnn Noonan*
- P23. First Reported Case of Anti-N-Methyl D-Aspartate Receptor Encephalitis in a Child With Crossed Cerebellar Diaschisis and Extreme Delta Brush.** *Eric L. Goldwaser, Sarah Edwards, Jana Elliker, Stephen J. Thompson*
- P24. Catatonia or Akinetic Mutism? Conceptualizing the Awakening of an Immobile Woman Who Responded to Stimulants After Failing Benzodiazepines and ECT.** *Veronika Hanko, Michael J. Schrif*
- P25. Sero-Negative Autoimmune Encephalitis in a Patient With Bipolar Disorder: Diagnostic and Treatment Challenges and the Role(s) of the Neuropsychiatrist.** *Colin J. Harrington, Jonathon F. Cahill, Michael A. Friedman, Myra P. Montalvo, Dylan Hershkowitz*

- P26. Catatonia and Delirium: Diagnostic and Treatment Challenges in the Hypokinetic Patient and The Limits of Empiricism.** *Colin J. Harrington, Christina D. Scully, Elliot J. Feld, James M. Badger, Dylan Hershkowitz*
- P27. Management of Agitated Delirium in Lamotrigine Overdose.** *Dylan Hershkowitz, Christina Scully*
- P28. Treatment Resistant Psychosis and Agitation Following a Left MCA and Left Fetal PCA Ischemic Stroke.** *Adam H. Hinzey*
- P29. Teaching Materials to Translate Neuroanatomical Knowledge From Textbook to the "Bedside/Clinic"—Part VI.** *Robin A. Hurley, Katherine H. Taber*
- P30. Progressive Supranuclear Palsy: Improved Cognitive-Behavioral Disturbances and Function of Motor Disabilities With Antidepressants and Cholinesterase Inhibitors.** *Terngu Ibilah, Jose J. Delgado Saenz, Jose Gavito-Higuera, Ricardo Salazar*
- P31. The Insula as a Hub of Limbic and Affective Processing: A Noninsular View.** *Tamar C. Katz, Michael G. Erkkinen, Aaron J. Hauptman*
- P32. Hippocampal Volume in Children With Recent-Onset Tics Predicts One-Year Tic Outcome.** *Soyoung Kim, Deanna J. Greene, Emily C. Bihun, Jonathan M. Koller, Haley Acevedo, Bradley L. Schlaggar, Kevin J. Black*
- P33. Morality and the Brain: Systematic Review of Lesional Causes of Immorality.** *Isaiah Kletenik, Jonathan H. Woodcock, Patricia S. Churchland, Christopher M. Filley*
- P34. Cases of Neuroinfectious Disease Highlighting Frontotemporal Neurocircuitry in Cognitive and Affective Processing.** *Michael D. Kritzer, Zeina N. Chemali*
- P35. History of Malignancy Is More Frequent in Non-demented versus Demented in the Oldest-Old.** *Christian Lachner, Gamze Balci Camsari, Neill R. Graff-Radford, Nilufer Ertekin-Taner, Ronald C. Petersen, David S. Knopman, Bradley F. Boeve, Robert R. Reichard, Dennis W. Dickson, Melissa E. Murray*
- P36. Remembering Addiction: A Case at the Interface of Cognition, Substance Use, and Complex Systems of Care.** *Chadrick E. Lane, Kelly J. McKinell, Cristina Montalvo*
- P37. Brain Medicine: Three Cases That Demonstrate the Utility of an Interdisciplinary Approach in Conditions Affecting Affect, Cognition, and Behavior.** *Sarah Levitt, Sara Mitchell, Kenneth Shulman*
- P38. Investigation of the Positron-Emission Tomography [18F]MK-6240 Tau Ligand in Genetic Frontotemporal Dementia.** *Jake P. Levy, Melissa Savard, Tharick A. Pascoal, Elizabeth Finger, Jean-Paul Soucy, Pedro Rosa-Neto, Simon Ducharme*
- P39. Wandering and Neuropsychiatric Manifestations in Patients With Cerebellar Lesions.** *Pedro M.G. Lopes, Catarina S.C. Prado, Fábio H.G. Porto, Roberta B.F. Passos, Raquel Q.M. Costa, Ana Carolina B. Ganem, Marco Antônio A. Leite, Rogério P. Marrocos*
- P40. Anticholinergic Use and Delirium in Hospitalized Patients With Dementia.** *Zachary A. Macchi, Peter S. Pressman*
- P41. Serving Providers who Serve Veterans: The Impact of a Consultation Program for Providers of Veterans at Risk for Suicide.** *Bridget B. Matarazzo, Megan Harvey, Georgia R. Gerard, Kaily Cannizzaro, W. Cole Lawson, Hal S. Wortzel*
- P42. Using Flumazenil to Potentiate Electroconvulsive Therapy (ECT) in Patients With Catatonia on High-Dose Benzodiazepines.** *Ruth McCann, Taber Lightbourne, Joshua Berman, Philip Muskin*
- P43. Patient-Centered Clinical Neuroscience Training to Facilitate Delivering the Diagnosis of Functional Neurological Disorder: Results From an Innovative Educational Workshop.** *Michel Medina, Luciana Giambarberi, Shebly Scott Lazarow, Juliana Lockman, Sepideh Bajestan*
- P44. Are People With Migraine Willing to Engage in Digitally Based Behavioral Therapies: A Look at Recruitment Statistics for a Mobile Health Study.** *Mia T. Minen, Sarah Corner*
- P45. Beyond Hip Replacement, a Case of Arthroplasty Cobalt Encephalopathy.** *Mandana Modirrousta*
- P46. Early Onset (EOAD) versus Late Onset Alzheimer's Disease (LOAD) in Two Mexican-American Women: A Clinical, Cognitive, and Neuroimaging Comparison Report.** *Shezaan Mornin, Jose Gavito-Higuera, Ricardo Salazar*
- P47. Are Outpatient Electroencephalograms Over-Utilized in Dementia With Lewy Bodies?** *Jakob Mrozewski, Peter S. Pressman, Samantha K. Holden*
- P48. The Influence of Post-Stroke Depression on Health-Related Quality of Life Among Stroke Survivors in a Low-Resource Setting.** *Obioma J. Ndubisi-Igwilo, Ibitein N. Okefor, Chukwuma U. Okefor*
- P49. A Systematic Review of Postmortem NMDA Receptor Expression Levels in Schizophrenia: Regional and Subunit-Specific Findings.** *Katlyn L. Nemani*
- P50. Visual Hallucinations of Autobiographic Memory and Asomatognosia: A Case of Epilepsy Due to Brain Cysticercosis.** *Juan Orjuela-Rojas, Jesús Ramírez-Bermudez, Iris Martínez-Juárez, Nora Kerik, Iván Meneses, Fernanda Pérez-Gay*
- P51. Emotional Modulation of Cognitive Performance—Potential Biomarker of Depression Severity.** *Jari Peräkylä, Kaija Järventausta, Pii Haapaniemi, Joan Camprodon, Kaisa M. Hartikainen*

- P52. Frontal Lobe Damage—A Case Report Reminiscent of Phineas Gage.** *Nanik Ram, Oyeyinka Oyinloye, Amareen Dhaliwal, Vishal Biala, Jerry Carter*
- P53. Mild Cognitive Impairment Preceding a Diagnosis of Gastrointestinal Stromal Tumor.** *Varun Y. Rawal, Arun Ramamurthy, Katherine B. Brownlowe*
- P54. Functional Movement Disorder and Response to Short-Term Psychodynamic Psychotherapy—A Case Report.** *Geoffrey Raynor, Gaston Baslet*
- P55. Continuation of Transcranial Magnetic Stimulation Treatment for Depression in Nonresponders: Results of a Naturalistic Study.** *Mahdi Razafsha, Sofia Uribe, Joan A Camprodon, Tracy Barbour*
- P56. An Information-Theoretic Characterization of Language Production in Primary Progressive Aphasia.** *Neguine Rezaii, Rachel Ryskin, Claire Cordella, Megan Quimby, Bradford Dickerson, Edward Gibson*
- P57. Imaging Correlates of Depressive Neuropsychiatric Symptoms in Traumatic Brain Injury: A Systematic Review of the Literature.** *Lisa N. Richey, Akshay Krieg, Barry R. Bryant, Nicholas T. Trapp, Jaxon Adkins, Melissa B. Jones, Shan Siddiqi, Andrew Bledsoe, Sahar Jahed, Michael J.C. Bray, Daniel A. Stevens, Carrie Roper, Eric Goldwaser, Liann Morris, Margo Lauterbach, Emily Berich-Anastasio, Tejus Pradeep, Alexandra Pletnikova, Katie Lobner, Daniel J. Lee, Matthew E. Peters*
- P58. Catatonia in a Bipolar Patient as a Manifestation of Non-Convulsive Epileptic Status.** *Valeria P. Richinho, Jefferson C. Folquitto, Mauro S. Oide-Junior, Debora P. Bassit*
- P59. A Case of Catatonia and Parkinsonism: Transcending Diagnostic Categories.** *Ana Maria Rivas-Grajales, Ali Abbas Asghar-Ali, Melissa Jones*
- P60. Electroconvulsive Therapy Leads to Plastic Changes in the Medial Forebrain Bundle Associated With Improvement in Anhedonia and Depression Severity.** *Ana Maria Rivas-Grajales, Palig Mouradian, George Papadimitriou, Erik Lee, Marek Kubicki, Nikos Makris, Joan A. Camprodon*
- P61. Cortical and Sub-Cortical Anatomical Correlation With Emergent Neuropsychiatric Symptoms in Mild Alzheimer's Disease.** *Ricardo Salazar, Hugo Sandoval, Carola Mullins, Roberto L. Garcia, Jose Gavito, Luis A. Alvarado, Alok K. Dwivedi, Vince D. Calhoun*
- P62. Effect of Yoga Nasal Irrigation for the Treatment of Episodic Migraine: Randomized Controlled Trial.** *Neha Sharma, Placheril John, Shekhar Sharma, Jaydeep Joshi*
- P63. Delirious Mania in Bipolar 1 Disorder and Parkinson's Disease.** *Eri Shoji, Ashley Maveddat, Regina Baronia, Yasin Ibrahim*
- P64. A Convergent Circuit for Depression Across Brain Lesions and Brain Stimulation.** *Shan H. Siddiqi, Andreas Horn, Frederic Schaper, Joey Hsu, Jaya Padmanabhan, Robin F.H. Cash, Natalia Egorova, Andrew M. Naidech, Sophia Gozzi, Tanh G. Phan, Ki Sueng Choi, Frederike Irmten, Andrea Kuhn, Paul B. Fitzgerald, Stephan F. Taylor, Amy Brodtmann, Rob P.W. Rouhl, Mark S. George, Joel L. Voss, Maurizio Corbetta, Darin D. Dougherty, Jordan H. Grafman, Helen S. Mayberg, Michael D. Fox*
- P65. AIDS-Associated CNS Toxoplasmosis Presenting as Psychosis.** *Eric R. Silverman*
- P66. Network Localization of Mania Symptoms Based on Focal Brain Lesions.** *Daniel Talmazov, Gonçalo Cotovio, J. Bernardo Barahona-Corrêa, Joey Hsu, Suhan Senova, Ricardo Ribeiro, Louis Soussand, Ana Velosa, Vera Cruz e Silva, Natalia Rost, Ona Wu, Alexander L. Cohen, Albino J. Oliveira-Maia, Michael D. Fox*
- P67. Symptoms of Common Mental Disorders and Food Insecurity Among HIV Patients.** *Markos Tesfaye Woldeyohannes, Crick Lund, Tsinuel Girma, Mette Fraham Olsen, Daniel Yilma, Girmay Medhin, Charlotte Hanlon*
- P68. Behavioral Dysregulation in Korsakoff Syndrome and Response to Donepezil.** *Kristina Thurin, Irina A. Skylar-Scott, Aaron J. Hauptman*
- P69. Corticobasal Degeneration: An Overlapping Syndrome With PPA & LBD: An Autopsied Case of Patient With Postmortem Diagnostic Confirmation.** *Vijaya Lakshmi Valaparla, Jamie M. Walker, Kevin F. Bieniek, Sudha Seshadri*
- P70. Psychogenic Nonepileptic Seizure Mimicking Patient's Brother Epileptic Seizure.** *Leandro Valiengo, Sigride Thome-Souza, Jose Gallucci-Neto, Lia A. Fiore, Daniela Kurgcant, Renato Marchetti*
- P71. Mirtazapine Induced Super Capillos Capitis Juvenescens Heautoscopy.** *Aneeta Wadhawan, Alan Hirsch, Harkaveer Boyal, Harmeet Wadhawan*
- P72. Vitamin A Not Just For Vision: Treatment of Hyposmia and Subjective Hypogeusia.** *Aneeta Wadhawan, Alan R. Hirsch, Harmeet Wadhawan, Harkaveer Boyal*
- P73. Chemosensory Simultagnosia: When Flavors Don't Mix.** *Harmeet Wadhawan, Alan R. Hirsch, Aneeta Wadhawan, Harkaveer Boyal*
- P74. Neurocognitive Sequelae of STAR Syndrome: A Clinical Case Report.** *Emily A.H. Warren, Mary Reeni M. George*
- P75. Neuropsychiatric and Neuroimaging Findings in Patients With Electrical Injury.** *Golnaz Yadollahikhales, Dillon Sharp, Zachary Resch, Jason R. Soble, Keith Thulborn, Raphael Lee, Neil H. Pliskin*
- P76. Neural Networks and Neural Networks: Start Making Sense.** *Taylor R. Young, Alexander A. Lichtenberg, Sheldon Benjamin*
